1     **PROTON MOTIVE FORCE INHIBITORS ARE DETRIMENTAL TO METHICILLIN-**  
2                    **RESISTANT *STAPHYLOCOCCUS AUREUS* PERSISTER CELLS**

3     **Sayed Golam Mohiuddin<sup>1</sup>, Sreyashi Ghosh<sup>1</sup>, Pouria Kavousi<sup>1</sup>, and Mehmet A. Orman<sup>1\*</sup>**

4     <sup>1</sup> Department of Chemical and Biomolecular Engineering, University of Houston, Houston, TX,  
5     USA

6     \*Correspondence to: S222 Engineering Bldg 1, 4726 Calhoun Rd, Houston, TX 77204, Phone:  
7     713-743-6785, Email: [norman@central.uh.edu](mailto:norman@central.uh.edu)

8  
9     **ABSTRACT**

10    Methicillin-resistant *Staphylococcus aureus* (MRSA) strains are resistant to conventional  
11    antibiotics. These pathogens can form persister cells, which are transiently tolerant to bactericidal  
12    antibiotics, making them extremely dangerous. Previous studies have shown the effectiveness of  
13    proton motive force (PMF) inhibitors at killing bacterial cells; however, whether these agents can  
14    launch a new treatment strategy to eliminate persister cells mandates further investigation. Here,  
15    using known PMF inhibitors and two different MRSA isolates, we showed that antipersister  
16    potency of PMF inhibitors seemed to correlate with their ability to disrupt PMF and permeabilize  
17    cell membranes. By screening a small chemical library to verify this correlation, we identified a  
18    subset of chemicals (including nordihydroguaiaretic acid, gossypol, trifluoperazine, and  
19    amitriptyline) that strongly disrupted PMF in MRSA cells by dissipating either the transmembrane  
20    electric potential ( $\Delta\Psi$ ) or the proton gradient ( $\Delta\text{pH}$ ). These drugs robustly permeabilized cell  
21    membranes and reduced persister levels below the limit of detection. Overall, our study further  
22    highlights the importance of cellular PMF as a target for designing new antipersister therapeutics.

23  
24    **Keywords:** Methicillin-resistant *Staphylococcus aureus*, proton motive force, persister cells,  
25    membrane permeabilization, PMF inhibitors, high-throughput drug screening.

26  
27

## 28 INTRODUCTION

29 The discovery of antibiotics in the 1940s was one of the most significant breakthroughs in  
30 therapeutic medicine. However, the medicinal potency of these lifesaving drugs has been  
31 drastically reduced by the emergence of new antibiotic-resistant mutant bacterial strains. The  
32 continuous evolution of pathogens to develop resistance against antibiotics, together with the  
33 decreased rate of antibiotic discovery, might eventually cause serious public health problems, as  
34 epidemics associated with resistant pathogens may be imminent. Bacterial persisters, phenotypic  
35 variants that are transiently tolerant to high concentrations of antibiotics<sup>1,2</sup>, exacerbate the problem,  
36 as they may form a reservoir for the emergence of antibiotic-resistant mutant strains<sup>3</sup>. Bacterial  
37 persistence is a non-heritable, reversible, antibiotic-tolerant state that can be triggered by stochastic  
38 and/or deterministic factors<sup>4-7</sup>. Persisters are the leading cause of the propensity of biofilm  
39 infections to relapse<sup>8</sup>.

40 *Staphylococcus aureus* is an opportunistic Gram-positive bacterial pathogen that colonizes human  
41 skin and mucous membranes, causing chronic, recurrent infections, including wound infections,  
42 bacteremia, and biofilm infections<sup>9,10</sup>. Methicillin, a narrow-spectrum beta-lactam antibiotic, was  
43 introduced in the late 1950s to treat infections caused by penicillin-resistant *S. aureus*<sup>11</sup>.  
44 Unfortunately, accession of the methicillin-resistance gene, *mecA*, encoding an alternative  
45 penicillin-binding protein, makes *S. aureus* infections extremely difficult to treat<sup>12</sup>. Methicillin-  
46 resistant *S. aureus* (MRSA) emerged as a major hypervirulent pathogen that causes severe  
47 healthcare-acquired infections, such as surgical site infections, hospital-acquired pneumonia,  
48 catheter-associated urinary tract infections, central line-associated bloodstream infections, and  
49 ventilator-associated pneumonia<sup>13</sup>. Almost 19,000 people die annually as a consequence of MRSA  
50 infections in the United States (US) alone<sup>14</sup>. Approximately 20% of patients in the US contract at  
51 least one nosocomial infection while undergoing surgery, which adds \$5–10 billion in costs to the  
52 US healthcare system<sup>15,16</sup>.

53 Quorum sensing, reactive oxygen species, the stringent response, inactivation of the tricarboxylic  
54 acid cycle, and the SOS response have been implicated in persister formation in *S. aureus*<sup>17-21</sup>.  
55 Reducing intracellular ATP formation with arsenate treatment can induce persistence in *S.*  
56 *aureus*<sup>22</sup>. However, intracellular *S. aureus* persisters isolated from human macrophages are  
57 metabolically active and display an altered transcriptomic profile<sup>17</sup>, suggesting that the correlation  
58 between high persistence and ATP reduction is not universal. Conventional antibiotics, such as

59 gentamicin (a protein synthesis inhibitor) and ciprofloxacin (a DNA synthesis inhibitor), fail to  
60 eliminate MRSA persisters<sup>21,23–25</sup>. Some MRSA strains have already acquired resistance against  
61 vancomycin (a cell wall biosynthesis inhibitor)<sup>26</sup>.

62 The cell membrane is an essential cellular component and might be a good target for novel  
63 antipersister therapeutics<sup>27</sup>. The bacterial proton motive force (PMF) maintains the  
64 electrochemical proton gradient across the cell membrane, an essential component of ATP  
65 synthesis<sup>27,28</sup>. The electric potential ( $\Delta\Psi$ ) and the transmembrane proton gradient ( $\Delta\text{pH}$ ) are the  
66 two components of PMF. Cells can compensate for the dissipation of one component by enhancing  
67 the other to maintain the necessary level of PMF<sup>29</sup>. A number of chemicals disrupt PMF of *S.*  
68 *aureus* by dissipating either  $\Delta\Psi$  or  $\Delta\text{pH}$ <sup>30–32</sup>. Halicin is a potential broad-spectrum antibacterial  
69 molecule that selectively dissipates  $\Delta\text{pH}$ <sup>31</sup>. The small molecule JD1 disrupts  $\Delta\Psi$ , kills MRSA cells,  
70 and significantly reduces biofilm formation<sup>32</sup>. Bedaquiline, SQ109, pyrazinamide, clofazimine,  
71 nitazoxanide, and 2-aminoimidazoles are also potent PMF inhibitors in gram-positive bacteria<sup>30,33</sup>.  
72 PMF inhibitors can also permeabilize the membranes of metabolically active cells through  
73 interactions with phospholipids or membrane-bound proteins<sup>34–36</sup>. Polymyxin B, a well-known  
74 inhibitor of  $\Delta\Psi$ , perturbs the cell membranes of bacteria by binding lipopolysaccharides<sup>27,37</sup>.

75 Although the effectiveness of PMF inhibitors against bacterial cells has been highlighted in prior  
76 studies<sup>27,31,34,37–41</sup>, whether PMF inhibitors can be used as an antipersister therapeutic strategy  
77 necessitates further investigation. In this study, we sought to determine if disrupting PMF of  
78 MRSA persisters can be detrimental for these cells. Because electron transport chain (ETC)  
79 complexes are highly conserved across species, we used a small library of 22 chemical compounds  
80 that inhibit various mitochondrial ETC complexes and identified several drugs  
81 (nordihydroguaiaretic acid, gossypol, trifluoperazine, and amitriptyline) that disrupted PMF in  
82 MRSA strains by dissipating either  $\Delta\text{pH}$  or  $\Delta\Psi$ . Although most of these chemicals drastically  
83 reduced MRSA survival compared with conventional antibiotics, our subsequent analysis verified  
84 that the extent of PMF disruption and membrane permeabilization is a key factor determining the  
85 treatment outcome.

86

87

88

## 89 RESULTS

### 90 PMF inhibitors can effectively kill MRSA strains

91 First, we tested the effectiveness of known PMF inhibitors, such as polymyxin B, thioridazine, and  
92 carbonyl cyanide m-chlorophenyl hydrazone (CCCP), on MRSA persistence in two isolates:  
93 MRSA BAA-41 and MRSA 700699. Polymyxin B is a cationic peptide that electrostatically binds  
94 the negatively charged moieties of lipopolysaccharides, disrupting  $\Delta\Psi$  and permeabilizing the cell  
95 membrane<sup>42</sup>. Thioridazine, an antipsychotic drug, disrupts  $\Delta\Psi$  in gram-positive bacteria,  
96 potentially by blocking NADH:quinone oxidoreductase II (NDH-II)<sup>36,43</sup>. CCCP is a protonophore  
97 that transports hydrogen ions across the cell membrane, subsequently reducing ATP production  
98 and disrupting PMF<sup>44</sup>.

99 Dissipation of either  $\Delta\Psi$  or  $\Delta\text{pH}$  by inhibitors may cause the eventual collapse of the bacterial  
100 cellular PMF and disrupt membrane integrity<sup>27</sup>. To assess the effects of PMF inhibitors on  
101 membrane permeability, strains MRSA BAA-41 and MRSA 700699 were grown to an optical  
102 density at 600 nm ( $\text{OD}_{600}$ ) of  $\sim 0.1$  in Mueller–Hinton broth in test tubes (**Supplementary Fig.**  
103 **S1**); treated with polymyxin B, thioridazine, or CCCP at 5 $\times$  or 10 $\times$  the minimum inhibitory  
104 concentration (MIC) for 1 hour (**Supplementary Table S1A**); and then stained with propidium  
105 iodide (PI). PI is a membrane-impermeant DNA- and RNA-binding dye that can only stain nucleic  
106 acids of cells with compromised membranes. Flow cytometric analysis of PI-stained cells revealed  
107 that polymyxin B at 5 $\times$  and 10 $\times$  MIC permeabilized more than 80% of MRSA BAA-41 cells (**Fig.**  
108 **1A** and **Supplementary Table S2A**) but less than 80% of MRSA 700699 cells (**Fig. 2A** and  
109 **Supplementary Table S2A**). Although robust membrane permeabilization was not observed after  
110 CCCP treatment at the indicated concentrations in either strain (**Fig. 1A**, **Fig. 2A**, and  
111 **Supplementary Table S2A**), thioridazine treatment at 5 $\times$  and 10 $\times$  MIC permeabilized more than  
112 90% of cells of both strains (**Fig. 1A**, **Fig. 2A**, and **Supplementary Table S2A**).

113 To determine whether the observed membrane permeabilization was linked to the perturbation of  
114 PMF, we used the potentiometric probe 3,3'-dipropylthiadicarbocyanine iodide [DiSC<sub>3</sub>(5)]  
115 (see **Materials and Methods**), which accumulates on polarized membranes and self-quenches its  
116 fluorescence<sup>27,31</sup>. Hyperpolarization due to perturbation of  $\Delta\text{pH}$  enhances the accumulation of  
117 DiSC<sub>3</sub>(5) and reduces the fluorescence signals, whereas disruption of  $\Delta\Psi$  increases fluorescence  
118 by releasing the probe into the medium<sup>27,31</sup>. Polymyxin B at 5 $\times$  and 10 $\times$  MIC disrupted the cellular

119 PMF by selectively dissipating  $\Delta\Psi$  in both strains in a concentration-dependent manner (**Fig. 1B**,  
120 **Fig. 2B**, and **Supplementary Table S2A**). The dissipation of  $\Delta\Psi$  was greater in thioridazine-  
121 treated cultures than in polymyxin B-treated cultures (**Fig. 1B**, **Fig. 2B**, and **Supplementary**  
122 **Table S2A**). Thioridazine at 10 $\times$  MIC increased the DiSC<sub>3</sub>(5) fluorescence level more than 11-  
123 fold in MRSA BAA-41 cells and more than 14-fold in MRSA 700699 cells when compared to  
124 untreated controls (**Fig. 1B**, **Fig. 2B**, and **Supplementary Table S2A**). However, CCCP at 5 $\times$  and  
125 10 $\times$  MIC did not disrupt PMF in either strain (**Fig. 1B**, **Fig. 2B**, and **Supplementary Table S2A**).  
126 We performed clonogenic survival assays to assess the effectiveness of these PMF inhibitors as  
127 antipersister drugs. MRSA BAA-41 and MRSA 700699 cells were treated with the inhibitors at  
128 5 $\times$  and 10 $\times$  MIC for 6 h to generate kill curves, given that the presence of persisters in a population  
129 leads to biphasic kill curves<sup>45</sup>. These assays revealed that CCCP was ineffective against MRSA  
130 strains and polymyxin B was unable to eradicate persister cells after 6 h of treatment at the tested  
131 concentrations (**Fig. 1C** and **Fig. 2C**). However, thioridazine, which disrupted cell membranes and  
132 PMF to a greater extent than the other tested drugs, reduced persister levels of both strains to below  
133 the limit of detection at both concentrations tested (**Fig. 1C** and **Fig. 2C**). Although a direct  
134 comparison of the effects of these three inhibitors on bacterial cell physiology, including their  
135 effects on persistence, might be difficult to obtain due to the concentration-dependent nature of  
136 these effects, our data show that the conditions that lead to enhanced membrane permeabilization  
137 and PMF disruption may eliminate persister cells.

### 138 **Conventional antibiotics do not eliminate MRSA persisters**

139 Next, we investigated whether similar correlations between membrane integrity, PMF levels, and  
140 persistence are observed when cells are treated with conventional antibiotics. We selected seven  
141 antibiotics, including kanamycin and gentamicin (aminoglycosides that inhibit protein  
142 biosynthesis by binding to the 30S ribosomal subunit)<sup>46</sup>, ampicillin (a beta-lactam that inhibits cell  
143 wall biosynthesis by binding to penicillin-binding proteins)<sup>47</sup>, ofloxacin and ciprofloxacin  
144 (quinolone antibiotics that block DNA synthesis by inhibiting DNA gyrase/topoisomerase)<sup>48</sup>,  
145 fosfomycin (a phosphonic acid that blocks cell wall biosynthesis by inhibiting the initial step  
146 involving phosphoenolpyruvate synthetase)<sup>49</sup>, and vancomycin (a glycopeptide antibiotic that  
147 inhibits cell wall biosynthesis by binding to the growing peptide chain)<sup>50</sup>. Using commercial strips,  
148 we confirmed that the MICs of kanamycin, gentamicin, ampicillin, ofloxacin, ciprofloxacin,

149 fosfomycin, and vancomycin for strain MRSA BAA-41 were within the standard test ranges  
150 (**Supplementary Table S1B**). As both kanamycin and gentamicin have a similar mode of action,  
151 kanamycin was selected for persister assays for this strain. MICs of ampicillin, ofloxacin,  
152 ciprofloxacin, and vancomycin were detectable for strain MRSA 700699, but this strain exhibited  
153 high resistance to kanamycin, gentamicin, and fosfomycin. We were unable to determine the MICs  
154 of these three antibiotics for strain MRSA 700699, which exceeded the standard test ranges  
155 (**Supplementary Table S1B**).

156 Exponential-phase cells ( $OD_{600}$  of  $\sim 0.1$ ) (**Supplementary Fig. S1**) of strains MRSA BAA-41 and  
157 MRSA 700699 were treated with conventional antibiotics at  $5\times$  and  $10\times$  MIC (**Supplementary**  
158 **Table S1B**) for PI staining, DiSC<sub>3(5)</sub>, and clonogenic survival assays as described above. MRSA  
159 BAA-41 was highly tolerant to kanamycin, ofloxacin, and ciprofloxacin, and these antibiotics  
160 neither permeabilized the cytoplasmic membrane nor dissipated the PMF of this strain at the  
161 concentrations tested (**Supplementary Fig. S3A–C**). Ampicillin, fosfomycin, and vancomycin  
162 were able to permeabilize the cell membrane without altering the PMF of strain MRSA BAA-41  
163 but did not eradicate the persister cells of this strain at the concentrations tested (**Supplementary**  
164 **Fig. S3A–C**). Similar trends were observed for strain MRSA 700699 (**Supplementary Fig. S4A–**  
165 **C**). Although ampicillin and vancomycin significantly permeabilized MRSA 700699 cells, at the  
166 concentrations tested, none of the antibiotics altered the cellular PMF or eradicated persister cells  
167 of this strain (**Supplementary Fig. S4A–C**). Altogether, the results of PMF inhibitor and  
168 conventional antibiotic treatments suggest that chemicals that increase both PMF dissipation and  
169 membrane permeabilization might be effective antipersister drugs. However, a statistical analysis  
170 is necessary to clarify whether PMF dissipation and membrane permeabilization can truly predict  
171 persister levels.

### 172 **Simple multivariable regression analysis identifies a linear correlation between independent** 173 **and response variables**

174 The patterns we observed among membrane permeabilization, PMF dissipation, and persister  
175 levels after treatment with known PMF inhibitors and conventional antibiotics suggest a  
176 correlation between these parameters. When we generated a membrane permeability vs. PMF  
177 disruption plot using data from all independent biological replicates for all combinations of MRSA  
178 strains and drug concentrations (**Fig. 3A**), we observed two distinct clusters. The first cluster in

179 this two-dimensional plot (**Fig. 3A**, red circle) primarily represents the data points corresponding  
180 to conventional antibiotics. Although some of these antibiotics (e.g., ampicillin, fosfomycin, and  
181 vancomycin) permeabilized cell membranes, they did not necessarily dissipate cellular PMF,  
182 indicating that these two parameters are not always related. The second cluster (**Fig. 3A**, blue  
183 circle) comprises the drugs that perturb PMF (e.g., thioridazine and polymyxin B). These drugs  
184 drastically permeabilized the cell membranes of both strains independent of PMF disruption and  
185 were more effective against persister cells than the drugs in the first cluster (**Fig. 3A**). The data on  
186 chemicals in the second cluster may indicate either a lack of correlation between membrane  
187 permeabilization and PMF disruption or the existence of a threshold level for PMF disruption that  
188 leads to drastic membrane permeabilization. If we assume that PMF dissipation and membrane  
189 permeabilization are two independent variables, and the persister outcome is the response variable,  
190 then the potential two-way interaction between the independent variables should be statistically  
191 verifiable.

192 Our three-dimensional scatter plot of membrane permeability, PMF disruption, and persister-level  
193 data may indicate a linear correlation between the independent and response variables (**Fig. 3B**).  
194 To test whether a two-way interaction exists between the independent variables, we performed a  
195 simple multivariable correlation analysis in which the response is predicted by the independent  
196 variables using two different linear model equations with or without an interaction term ( $\beta_3$ , **Fig.**  
197 **3C, D**). The first model equation without the interaction term indicates that PMF disruption has a  
198 significant effect on persister level ( $P < 0.0001$ ), but membrane permeability has a comparatively  
199 smaller effect ( $P = 0.2067$ ) (**Fig. 3C, D**). Although the analysis associated with the second model  
200 equation may suggest the existence of interaction between the independent variables, the F  
201 statistics used to compare the model equations indicate that the first model fits the experimental  
202 data better than the second model ( $P < 0.01$ ) (**Fig. 3C, D**). However, both regression models fit the  
203 experimental data better than a model that contains no independent variables ( $P < 0.00001$ ).

204 Our experimental data, together with the statistical analysis, demonstrate the importance of cellular  
205 PMF dissipation on MRSA persister levels, regardless of the strains used. Although these model  
206 equations may not predict the exact number of persister cells, they may predict the conditions  
207 necessary to reduce the level of persister cells to below the limit of detection. When we calculated  
208 the minimum PMF disruption required to eradicate persister cells if 90% of the cells are assumed  
209 to be permeabilized, the first and second model equations revealed that at least  $16.22 \pm 4.72$ -fold

210 and  $17.85 \pm 3.91$ -fold PMF disruption, respectively, is required to reduce MRSA persister levels  
211 to below the limit of detection [5 colony-forming units (CFU)/ml], which is consistent with our  
212 experimental data (**Fig. 1** and **Fig. 2**). However, whether PMF inhibitors can truly be used as  
213 antipersister drugs requires further validation, as our current analysis includes a limited number of  
214 PMF inhibitors.

### 215 **High-throughput screening identified new PMF inhibitors for the MRSA strains**

216 To identify additional PMF inhibitors, we screened a small chemical library, MitoPlate I-1,  
217 containing 22 mitochondrial inhibitors. Each chemical was tested at four different concentrations  
218 in the wells of a 96-well plate. These chemicals included complex I inhibitors (rotenone and  
219 pyridaben), complex II inhibitors (malonate and carboxin), complex III inhibitors (antimycin A  
220 and myxothiazol), uncouplers [trifluoromethoxy carbonylcyanide phenylhydrazone (FCCP) and  
221 2,4-dinitrophenol], ionophores (valinomycin and calcium chloride), and other chemicals  
222 (gossypol, nordihydroguaiaretic acid, polymyxin B, amitriptyline, meclizine, berberine, alexidine,  
223 phenformin, diclofenac, celastrol, trifluoperazine, and papaverine) that directly or indirectly inhibit  
224 the ETC of mitochondria<sup>51,52,61,62,53–60</sup>. Although this library was specifically designed for  
225 mammalian cells, we reasoned that some of the chemicals might be effective for bacteria as the  
226 ETC is evolutionarily conserved<sup>63</sup>. Exponential-phase cells ( $OD_{600}$  of  $\sim 0.1$ ) of strains MRSA  
227 BAA-41 and MRSA 700699 were used to perform the DiSC<sub>3</sub>(5) assay for our initial screening.  
228 For both strains, alexidine, diclofenac, celastrol, trifluoperazine, and amitriptyline selectively  
229 dissipated  $\Delta\Psi$  [increase in DiSC<sub>3</sub>(5) fluorescence levels compared to untreated control], whereas  
230 nordihydroguaiaretic acid and gossypol selectively dissipated  $\Delta pH$  [decrease in DiSC<sub>3</sub>(5)  
231 fluorescence levels compared to untreated control] (**Supplementary Fig. S5** and **Fig. S6**). FCCP  
232 and antimycin A particularly disrupted the PMF in strain MRSA BAA-41 (**Supplementary Fig.**  
233 **S5**).

234 We performed PI staining, DiSC<sub>3</sub>(5), and clonogenic survival assays to verify the reproducibility  
235 and efficacy of the identified chemicals against MRSA persisters. Exponential-phase cells ( $OD_{600}$   
236 of  $\sim 0.1$ ) of strains MRSA BAA-41 and MRSA 700699 were treated with the identified drugs at  $5\times$   
237 and  $10\times$  MIC. A two-fold macro-dilution method<sup>64</sup> was used to determine the MICs of these drugs  
238 (**Supplementary Table S1C**). The MIC of antimycin A is much higher than the range we tested  
239 ( $0.0078125$ – $2$  mM); therefore, antimycin A was not tested in the persister response assays. Our



240 results showed that nordihydroguaiaretic acid and gossypol drastically perturbed the PMF by  
241 dissipating  $\Delta pH$ , robustly permeabilized cell membranes, and reduced persister levels to below the  
242 limit of detection within 6 h of treatment at the concentrations tested for both MRSA BAA-41 and  
243 MRSA 700699 (**Fig. 4A–C** and **Fig. 5A–C**). The potency of gossypol in targeting cellular PMF  
244 seemed to be quite high, as it reduced DiSC<sub>3</sub>(5) fluorescence levels more than 122-fold at 10×  
245 MIC compared to untreated cells (**Fig. 4B**, **Fig. 5B**, and **Supplementary Table S2C**).  
246 Trifluoperazine and amitriptyline similarly reduced persister levels to below the limit of detection  
247 for both strains; however, these drugs potentially permeabilized the cell membrane by dissipating  
248  $\Delta\Psi$  (**Fig. 4A–C** and **Fig. 5A–C**). Alexidine, FCCP, diclofenac, and celastrol affected persister  
249 levels, cellular PMF, and membrane permeabilization in a concentration-dependent manner for  
250 both strains (**Supplementary Fig. S7A–C** and **Fig. S8A–C**). Although conditions that drastically  
251 disrupted cellular PMF and permeabilized the membrane (e.g., alexidine treatment at 10× MIC)  
252 reduced persister levels to below the limit of detection (**Supplementary Fig. S7A–C**, **Fig. S8A–**  
253 **C**, and **Table S2C**), conditions that barely perturbed PMF and cell membrane permeabilization  
254 (e.g., celastrol treatments at 5× and 10× MIC) were ineffective in eliminating persister cells  
255 (**Supplementary Fig. S7A–C**, **Fig. 8A–C**, and **Table S2C**).

256 The results of our screening assay support our initial analysis, highlighted in **Fig. 3**. When we  
257 repeated our statistical analysis by combining the new and initial data sets of independent variables  
258 (PMF disruption and membrane permeability) for all drugs and conditions, we found that the first  
259 model (without a two-way interaction) fit the experimental data better than the second model ( $P <$   
260  $0.01$ ) (**Supplementary Fig. S9A, B**). Although both PMF disruption and membrane permeability  
261 had significant effects on persister levels ( $P < 0.0001$ ), the effects of interactions between PMF  
262 and membrane permeability on persistence were insignificant with the addition of new data ( $P =$   
263  $0.1495$ ). Altogether, our results verified that conditions leading to robust disruption of PMF and  
264 drastic cell membrane permeabilization could reduce persister levels to below the limit of  
265 detection.

266

## 267 **DISCUSSION**

268 In this study, the strains MRSA BAA-41 and MRSA 700699 were employed to explore the  
269 disruption of PMF as a potential therapeutic approach against MRSA persister cells. These strains

270 are *S. aureus* clinical isolates that are intrinsically resistant to methicillin<sup>26,65</sup>. MRSA BAA-41 was  
271 isolated from a patient in a New York City hospital in 1994<sup>65</sup>. MRSA 700699 was isolated from  
272 the pus and debrided tissue that developed at a surgical incision in the sternum of an infant from  
273 Japan<sup>26</sup>. The two strains have different growth rates—MRSA BAA-41 proliferates faster than  
274 MRSA 700699 in Mueller–Hinton broth (**Supplementary Fig. S1**)—and are both highly tolerant  
275 to conventional antibiotics.

276 Our initial data sets obtained from known PMF inhibitors and conventional antibiotics highlight a  
277 strong correlation between cellular membrane permeabilization, PMF disruption, and persister  
278 levels in MRSA strains. Our statistical analysis demonstrated that the two independent variables  
279 (membrane permeabilization and PMF disruption) had a significant effect on the response variable  
280 (persister levels). We further showed that the response variable can be defined by a linear  
281 regression model with an insignificant two-way interaction between the independent variables.  
282 However, this lack of statistical interaction does not necessarily imply that PMF and membrane  
283 integrity are not related. PMF inhibitors seem to permeabilize cell membranes either completely  
284 (e.g., thioridazine) or not at all (e.g., CCCP), depending on their potency; therefore,  
285 permeabilization mediated by PMF inhibitors could potentially occur above a certain potency  
286 threshold. Because our experimental results and data analysis suggest that PMF inhibitors can be  
287 effective antipersister drugs or adjuvants for MRSA strains, we screened a small chemical library  
288 containing 22 mitochondrial inhibitors and found that several drugs, including  
289 nordihydroguaiaretic acid, gossypol, trifluoperazine, amitriptyline, and alexidine, were effective  
290 PMF inhibitors for MRSA strains and could robustly permeabilize the cell membrane and reduce  
291 persister levels to below the limit of detection.

292 The chemicals in the library inhibit different mechanisms of the mitochondrial ETC  
293 system<sup>51,52,61,62,66–68,53–60</sup>. The ETC is evolutionarily conserved across species<sup>63</sup>, which may explain  
294 the observed high hit rate achieved by screening a small chemical library. As cancer cells are  
295 characterized by increased proliferation and mitochondrial activities, these drugs are effective  
296 inhibitors for many cancer cells. Gossypol is a naturally occurring aldehyde extracted from a cotton  
297 plant that inhibits two fragments of mitochondrial electron transfer and triggers the production of  
298 reactive oxygen species<sup>62</sup>, which has antitumor effects against several myeloma cells by inducing  
299 apoptosis<sup>69</sup>. Trifluoperazine is an antipsychotic drug that dissipates mitochondrial transmembrane  
300 potential, permeabilizes the plasma membrane, and decreases the viability of hepatoma tissue

301 culture cells *in vitro*<sup>68</sup>. Amitriptyline is a tricyclic antidepressant drug that inhibits the activities of  
302 mitochondrial complex III and stimulates the generation of reactive oxygen species in human  
303 hepatoma cells<sup>70</sup>. Other identified drugs, including nordihydroguaiaretic acid, alexidine, and  
304 celastrol, induce mitochondrial apoptosis in cancer cells<sup>55,61,71</sup>.

305 PMF is crucial for bacterial cell growth and survival under normal and/or stress conditions<sup>44</sup>. As  
306 the driving force for ATP synthesis via F<sub>1</sub>F<sub>0</sub>-ATPase<sup>44</sup>, PMF provides the necessary energy for  
307 many intracellular processes, forming the Achilles heel of living organisms; therefore, the  
308 dissipation of one of its components ( $\Delta\Psi$  or  $\Delta\text{pH}$ ) can dismantle the cellular adenylate energy  
309 charge and kill bacteria<sup>27</sup>. Several studies have demonstrated the importance of PMF for the  
310 elimination of bacterial persisters<sup>23,27,72</sup>. Persister cells can consume specific carbon sources and  
311 generate PMF through the oxidative ETC, making them vulnerable to the presence of  
312 aminoglycosides<sup>23</sup>. Significant reductions in persister levels are observed when ETC activity, the  
313 driving force of the PMF, is genetically and chemically repressed<sup>72</sup>. Starvation-induced antibiotic-  
314 tolerant cells can be eradicated by disrupting cellular PMF<sup>73</sup>, emphasizing the importance of PMF  
315 as an antimicrobial target.

316 Our screening assay identified a number of drugs that were highly effective against MRSA  
317 persisters. In *Escherichia coli*, trifluoperazine irreversibly inhibits ATP synthase by interacting  
318 with the F<sub>0</sub> and F<sub>1</sub> subunits<sup>74</sup>. Amitriptyline inhibits the AcrB multidrug efflux pump in *Salmonella*  
319 *typhimurium* and *E. coli* strains<sup>75</sup> and kills drug-resistant gram-positive and -negative bacteria  
320 when used as an antibiotic adjuvant<sup>76</sup>. Nordihydroguaiaretic acid disrupts the cytoplasmic  
321 membrane and reduces intracellular ATP levels of *S. aureus*<sup>77</sup>. Alexidine has broad-spectrum  
322 activities against *Enterococcus faecalis* biofilm infections and fungal pathogens<sup>78</sup>. However, the  
323 exact molecular mechanism of action of alexidine against bacteria has yet to be elucidated.  
324 Diclofenac inhibits DNA synthesis in *E. coli* and *S. aureus* and exhibits antibacterial activity<sup>79</sup>. In  
325 addition, celastrol treatment makes *B. subtilis* cells elongated and spindle-shaped. Using  
326 transmission electron microscopy, celastrol has been shown to damage cell membranes to a certain  
327 extent<sup>80</sup>. Altogether, although the bactericidal effects of the identified PMF inhibitors (e.g.,  
328 nordihydroguaiaretic acid, gossypol, trifluoperazine, amitriptyline, and alexidine) have already  
329 been highlighted in the literature, their effects on persister cells, to the best of our knowledge, have  
330 not been well characterized.

331 In *E. coli*, thioridazine was previously shown to selectively dissipate  $\Delta\text{pH}$  by potentially  
332 interacting with membrane-bound proteins associated with energy metabolism, such as  
333 succinate:quinone oxidoreductase (SdhA, SdhB, SdhC, and SdhD); cytochrome bd-I ubiquinol  
334 oxidase (CydX); and NADH:quinone oxidoreductase complexes (NuoJ and NuoF)<sup>81</sup>. However,  
335 our current study demonstrated that thioridazine disrupts  $\Delta\Psi$  in gram-positive bacteria, underlining  
336 the existence of distinct mechanisms across species. Culture conditions (e.g., inhibitor  
337 concentrations and the timing of inhibitor addition); redundant interactions between the inhibitors  
338 and cellular components; the existence or absence of an outer membrane; and the thickness of  
339 peptidoglycans may affect the cellular responses to treatments. Moreover, we found that lower  
340 concentrations ( $5\times$  MIC) of thioridazine, CCCP, FCCP, trifluoperazine, amitriptyline, diclofenac,  
341 and celastrol disrupted cellular PMF more than higher concentrations ( $10\times$  MIC). These PMF  
342 inhibitors disrupt  $\Delta\Psi$ , and we did not observe the same phenomenon for inhibitors that selectively  
343 dissipate  $\Delta\text{pH}$ , which warrants further investigation.

344 The rise of antibiotic tolerance is one of the most critical global public health threats of the 21st  
345 century, and bacterial persistence contributes to this problem, as persister variants facilitate the  
346 recurrence of chronic infections and the emergence of drug-resistant mutants. Here, we  
347 demonstrate that PMF inhibitors can be highly effective bactericidal antibiotics with the potential  
348 to eradicate persister cells. Our statistical analysis verified that inhibitors that enhance PMF  
349 disruption and cell membrane permeabilization could be potent antipersister drugs. The outcomes  
350 of this study also support the use of screening strategies<sup>27</sup> for the development of novel drugs that  
351 selectively target bacterial PMF.

352

## 353 **MATERIALS AND METHODS**

### 354 **Bacterial strains, chemicals, and culture conditions**

355 The strains MRSA BAA-41 and MRSA 700699 used in this study were obtained from Dr. Kevin  
356 W. Garey at the University of Houston<sup>26,65</sup>. Chemicals were purchased from Fisher Scientific  
357 (Atlanta, GA), VWR International (Pittsburg, PA), or Sigma Aldrich (St. Louis, MO). MitoPlate  
358 I-1 (Catalog# 14104) used for chemical screening (**Supplementary Table S3**) was obtained from  
359 Biolog, Inc. (Hayward, CA). The chemical library contained four different concentrations ( $C_1$ ,  $C_2$ ,  
360  $C_3$ , and  $C_4$ ) for each drug. However, these concentrations were not disclosed by the vendor.

361 Mueller–Hinton broth [2.0 g beef extract powder, 17.5 g acid digest of casein, and 1.5 g soluble  
362 starch in 1 L deionized (DI) water] was used to grow the MRSA strains. To enumerate the CFU,  
363 Mueller–Hinton agar (2.0 g beef extract powder, 17.5 g acid digest of casein, 1.5 g soluble starch,  
364 and 17.0 g agar in 1 L DI water) was used. Treated cells were washed with 1× phosphate-buffered  
365 saline (PBS) solution to lower the concentrations of antibiotics and chemicals below their MICs.  
366 Conventional antibiotics (kanamycin, ampicillin, ofloxacin, ciprofloxacin, fosfomycin, and  
367 vancomycin); known PMF inhibitors (CCCP, polymyxin B, and thioridazine); and the hit  
368 chemicals obtained from the screening assay (alexidine, nordihydroguaiaretic acid, FCCP,  
369 diclofenac, celastrol, gossypol, trifluoperazine, and amitriptyline) were used at 5× and 10× MIC to  
370 treat the MRSA strains. MICs of antibiotics and identified chemicals for the two strains are  
371 provided in **Supplementary Table S1A–C**. The ETEST strip method was used to determine the  
372 MICs of kanamycin, ampicillin, ofloxacin, ciprofloxacin, fosfomycin, and vancomycin. A two-  
373 fold serial dilution (macro-dilution) method was used to detect the MICs of CCCP, polymyxin B,  
374 thioridazine, alexidine, nordihydroguaiaretic acid, FCCP, diclofenac, celastrol, gossypol,  
375 trifluoperazine, and amitriptyline<sup>64</sup>. The vendor, catalog, and purity information of all chemicals  
376 is listed in **Supplementary Table S4**. The solvents and stock solution concentrations of chemicals  
377 are tabulated in **Supplementary Table S5**. Chemicals dissolved in DI water were sterilized with  
378 0.2-µm syringe filters. An autoclave was used to sterilize liquid and solid media. Overnight pre-  
379 cultures were prepared by inoculating cells from a 25% glycerol cell stock (stored at –80 °C) in a  
380 14-ml round-bottom Falcon test tube containing 2 ml Mueller–Hinton broth and cultured at 37 °C  
381 for 24 h in an orbital shaker at 250 revolutions per minute (rpm). Main cultures were prepared by  
382 diluting overnight pre-cultures 100-fold into 2 ml fresh Mueller–Hinton medium in 14-ml test  
383 tubes. Unless otherwise stated, chemical treatments were performed at the exponential phase  
384 (OD<sub>600</sub> of ~0.1) for 6 h. The shaker speed and temperature were kept constant (250 rpm and 37  
385 °C) in all experiments.

### 386 **Cell growth and persister quantitation by clonogenic survival assays**

387 Overnight pre-cultures were diluted 100-fold in 14-ml test tubes containing 2 ml Mueller–Hinton  
388 medium and grown in the shaker. At indicated time points, cell samples were collected to measure  
389 OD<sub>600</sub> with a Varioskan LUX Multimode Microplate Reader (Thermo Fisher, Waltham, MA,  
390 USA). When the cultures reached an OD<sub>600</sub> of 0.1, cells were treated with antibiotics or chemicals  
391 at 5× and 10× MIC. At designated time points, 200 µl treated cultures were collected and diluted

392 in 800  $\mu$ l sterile PBS. Diluted cell cultures were then washed twice with PBS by centrifugation at  
393 13,300 rpm ( $17,000 \times g$ ) for 3 minutes to remove the antibiotics and chemicals, as described  
394 elsewhere<sup>82</sup>. After the final centrifugation, 900  $\mu$ l supernatant was removed, and the pelleted cells  
395 were resuspended the remaining 100  $\mu$ l, which was then used for a 10-fold serial dilution in 90  $\mu$ l  
396 PBS. Ten microliters of diluted cells were then spotted on Mueller–Hinton agar. Ninety microliters  
397 of undiluted cell suspension were also plated on Mueller–Hinton agar to increase the limit of  
398 detection (which is equivalent to  $\sim 5$  CFU/ml). After incubation of the agar plates for 16 h at 37  
399  $^{\circ}$ C, CFUs were counted to determine the persister levels. Incubations longer than 16 h did not  
400 increase the CFU levels.

#### 401 **DiSC<sub>3</sub>(5) assay**

402 Overnight pre-cultures were diluted 100-fold in 14-ml test tubes containing 2 ml fresh Mueller–  
403 Hinton broth and grown at 37  $^{\circ}$ C with shaking (250 rpm). Exponential-phase cells ( $OD_{600}$  of  $\sim 0.1$ )  
404 were collected, washed three times with a buffer solution (50 mM HEPES, 300 mM KCl, and 0.1%  
405 glucose), and centrifuged at 13,300 rpm<sup>31</sup>. After the final washing step, pelleted cells were  
406 resuspended in 2 ml buffer, loaded with 1  $\mu$ M DiSC<sub>3</sub>(5) dye, and incubated in the dark. The  
407 fluorescence levels were measured with a plate reader at 620-nm excitation and 670-nm emission  
408 wavelengths every 10 minutes. When the fluorescence levels reached an equilibrium state (after  
409 30 minutes), stained cells were treated with chemicals at indicated concentrations and incubated  
410 in the dark. At designated time points, 200  $\mu$ l cells were collected to measure the fluorescence  
411 levels. Cultures that did not receive any chemical treatment served as control.

#### 412 **Chemical screening assay**

413 Overnight pre-cultures were diluted 100-fold in 14-ml test tubes containing 2 ml fresh Mueller–  
414 Hinton broth and grown at 37  $^{\circ}$ C with shaking (250 rpm). Cells at an  $OD_{600}$  of  $\sim 0.1$  were collected  
415 and washed three times in buffer (50 mM HEPES, 300 mM KCl, and 0.1% glucose) with  
416 centrifugation at 13,300 rpm. After the final washing step, pelleted cells were resuspended in  
417 buffer, loaded with 1  $\mu$ M DiSC<sub>3</sub>(5) dye, and incubated in the dark. Once the fluorescence levels  
418 reached a steady-state (after 30 minutes), 100  $\mu$ l stained cells were transferred to each well of the  
419 MitoPlate I-1 preloaded with chemicals (**Supplementary Table S3**) and incubated in the dark.  
420 The fluorescence level of each well was measured with the plate reader at designated time points.  
421 Wells without chemicals (A1–A8) served as controls.

## 422 **PI staining**

423 Overnight pre-cultures were diluted 100-fold in 14-ml test tubes containing 2 ml fresh Mueller–  
424 Hinton broth and grown at 37 °C with shaking. Cells at an OD<sub>600</sub> of ~0.1 were treated with the  
425 chemicals at indicated concentrations for 1 h. Treated cells were then collected and diluted in  
426 0.85% NaCl solution in flow cytometry tubes (5-ml round-bottom Falcon tubes) to obtain a final  
427 cell density of ~10<sup>6</sup> cells/ml. The resulting cell suspensions were stained with 20 μM PI dye and  
428 incubated at 37 °C in the dark for 15 minutes. Stained cells were collected and analyzed with a  
429 flow cytometer (NovoCyte Flow Cytometer, NovoCyte 3000RYB, ACEA Biosciences Inc., San  
430 Diego, CA, US). Ethanol (70% v/v)-treated cells (i.e., dead cells) were used as a positive control  
431 (PI-positive cells), and PI-stained live cells (PI-negative cells) served as a negative control  
432 (**Supplementary Fig. S2A, B**). Forward and side scatter parameters obtained from the untreated  
433 live cells were used to gate the cell populations on the flow cytometry diagram<sup>83</sup>. For the  
434 fluorescence measurement, cells were excited at a 561-nm wavelength and detected with a 615/20-  
435 nm bandpass filter.

## 436 **Multivariable linear regression analysis**

437 Multivariable linear regression analysis was performed to determine correlations between the  
438 response (persister levels) and independent variables (PMF disruption and membrane  
439 permeability). CFU/ml, PMF, and membrane permeabilization data sets used here correspond to  
440 the last time points of the related assays. Log-transformed values of CFU/ml obtained from  
441 clonogenic survival assays were used to measure persister levels. PMF disruption was defined as  
442 the fold change in DiSC<sub>3</sub>(5) fluorescence levels between treated and untreated cells, and membrane  
443 permeability was defined as the percentage of PI-positive cells in the flow cytometry diagram.  
444 GraphPad Prism 9.3.0 was used to perform the multiple linear regression analysis. The linear  
445 model equations without and with a two-way interaction are as follows, respectively:

$$446 \quad P_L = \beta_0 + \beta_1 \times P_D + \beta_2 \times P_M$$

$$447 \quad P_L = \beta_0 + \beta_1 \times P_D + \beta_2 \times P_M + \beta_3 \times P_D \times P_M$$

448 In these equations,  $P_L$  is the log-transformed value of the persister levels,  $P_D$  is PMF disruption,  
449  $P_M$  is membrane permeability,  $\beta_0$  is the estimate of the model intercept,  $\beta_1$  is the estimate of the  
450 model coefficient of PMF disruption,  $\beta_2$  is the estimate of the model coefficient of membrane

451 permeability, and  $\beta_3$  is the estimate of the model coefficient of the interaction term. The parameters  
452 identified from the regression analysis were used to generate three-dimensional plots with  
453 MATLAB. Quantile–quantile (QQ) probability plots were generated to check the normality of the  
454 data set (**Supplementary Fig. S10**).

#### 455 **Data analysis**

456 Unless stated otherwise, at least three independent biological replicates were performed for each  
457 experiment. FlowJo (version 10.8.1) software was used to analyze the flow cytometry data. Each  
458 data point in the figures denotes the mean value, and error bars represent the standard deviation  
459 (SD). F statistics were used to determine significant differences between the model equations.  
460 Student's *t*-tests with unequal variance were performed to determine the statistical significance  
461 between two groups. P-value thresholds were selected as \*P < 0.01, \*\*P < 0.001, \*\*\*P < 0.0001;  
462 ns indicates not significant.

#### 463 **ACKNOWLEDGMENTS**

464 The authors would like to thank Orman Lab members for their help. This study was supported by  
465 an NIH/NIAID R01 AI143643 Award and a University of Houston start-up grant.

#### 466 **AUTHOR CONTRIBUTIONS**

467 S.G.M., S.G., P.K. and M.A.O. conceived and designed the study. S.G.M., S.G., and P.K.  
468 performed the experiments. S.G.M., S.G., and M.A.O. analyzed the data and wrote the paper. All  
469 authors have read and approved the manuscript.

#### 470 **NOTES**

471 The authors declare no competing interests.

472

#### 473 **REFERENCES**

- 474 (1) Hobby, G. L.; Meyer, K.; Chaffee, E. Observations on the Mechanism of Action of  
475 Penicillin. **2016**, *50* (2), 281–285.
- 476 (2) Bigger, J. W. Treatment of *Staphylococcal* Infections with Penicillin by Intermittent  
477 Sterilisation. *Lancet* **1944**, *244* (6320), 497–500.
- 478 (3) Levin-Reisman, I.; Ronin, I.; Gefen, O.; Braniss, I.; Shores, N.; Balaban, N. Q.



- 479 Antibiotic Tolerance Facilitates the Evolution of Resistance. *Science*. **2017**, *355* (6327),  
480 826–830.
- 481 (4) Zalis, E. A.; Nuxoll, A. S.; Manuse, S.; Clair, G.; Radlinski, L. C.; Conlon, B. P.; Adkins,  
482 J.; Lewis, K. Stochastic Variation in Expression of the Tricarboxylic Acid Cycle Produces  
483 Persister Cells. *MBio* **2019**, *10* (5).
- 484 (5) Helaine, S.; Cheverton, A. M.; Watson, K. G.; Faure, L. M.; Matthews, S. A.; Holden, D.  
485 W. Internalization of Salmonella by Macrophages Induces Formation of Nonreplicating  
486 Persisters. *Science*. **2014**, *343* (6167), 204–208.
- 487 (6) Vega, N. M.; Allison, K. R.; Khalil, A. S.; Collins, J. J. Signaling-Mediated Bacterial  
488 Persister Formation. *Nat. Chem. Biol.* **2012**, *8* (5), 431–433.
- 489 (7) Nguyen, D.; Joshi-Datar, A.; Lepine, F.; Bauerle, E.; Olakanmi, O.; Beer, K.; McKay, G.;  
490 Siehnel, R.; Schafhauser, J.; Wang, Y.; Britigan, B. E.; Singh, P. K. Active Starvation  
491 Responses Mediate Antibiotic Tolerance in Biofilms and Nutrient-Limited Bacteria.  
492 *Science*. **2011**, *334* (6058), 982–986.
- 493 (8) Lewis, K. Persister Cells, Dormancy and Infectious Disease. *Nat. Rev. Microbiol.* *2006* *51*  
494 **2006**, *5* (1), 48–56.
- 495 (9) Otto, M. Community-Associated MRSA: What Makes Them Special? *Int. J. Med.*  
496 *Microbiol.* **2013**, *303* (6–7), 324–330.
- 497 (10) Strauß, L.; Stegger, M.; Akpaka, P. E.; Alabi, A.; Breurec, S.; Coombs, G.; Egyir, B.;  
498 Larsen, A. R.; Laurent, F.; Monecke, S.; Peters, G.; Skov, R.; Strommenger, B.;  
499 Vandenesch, F.; Schaumburg, F.; Mellmann, A. Origin, Evolution, and Global  
500 Transmission of Community-Acquired Staphylococcus Aureus ST8. *Proc. Natl. Acad. Sci.*  
501 *U. S. A.* **2017**, *114* (49), E10596–E10604.
- 502 (11) Jevons, M. P. “Celbenin” - Resistant Staphylococci. *Br. Med. J.* **1961**, *1* (5219), 124.
- 503 (12) Hiramatsu, K.; Cui, L.; Kuroda, M.; Ito, T. The Emergence and Evolution of Methicillin-  
504 Resistant Staphylococcus Aureus. *Trends Microbiol.* **2001**, *9* (10), 486–493.
- 505 (13) Rello, J.; Sole-Violan, J.; Sa-Borges, M.; Garnacho-Montero, J.; Muñoz, E.; Sirgo, G.;

- 506 Olona, M.; Diaz, E. Pneumonia Caused by Oxacillin-Resistant Staphylococcus Aureus  
507 Treated with Glycopeptides. *Crit. Care Med.* **2005**, *33* (9), 1983–1987.
- 508 (14) Klevens, R. M.; Morrison, M. A.; Nadle, J.; Petit, S.; Gershman, K.; Ray, S.; Harrison, L.  
509 H.; Lynfield, R.; Dumyati, G.; Townes, J. M.; Craig, A. S.; Zell, E. R.; Fosheim, G. E.;  
510 McDougal, L. K.; Carey, R. B.; Fridkin, S. K. Invasive Methicillin-Resistant  
511 Staphylococcus Aureus Infections in the United States. *JAMA* **2007**, *298* (15), 1763–1771.
- 512 (15) Horan, T. C.; Culver, D. H.; Gaynes, R. P.; Jarvis, W. R.; Edwards, J. R.; Reid, C. R.  
513 Nosocomial Infections in Surgical Patients in the United States, January 1986-June 1992.  
514 National Nosocomial Infections Surveillance (NNIS) System. *Infect. Control Hosp.*  
515 *Epidemiol.* **1993**, *14* (2), 73–80.
- 516 (16) Brady, R. A.; O’May, G. A.; Leid, J. G.; Prior, M. L.; Costerton, J. W.; Shirtliff, M. E.  
517 Resolution of Staphylococcus Aureus Biofilm Infection Using Vaccination and Antibiotic  
518 Treatment. *Infect. Immun.* **2011**, *79* (4), 1797–1803.
- 519 (17) Peyrusson, F.; Varet, H.; Nguyen, T. K.; Legendre, R.; Sismeiro, O.; Coppée, J. Y.; Wolz,  
520 C.; Tenson, T.; Van Bambeke, F. Intracellular Staphylococcus Aureus Persists upon  
521 Antibiotic Exposure. *Nat. Commun.* **2020**, *11* (1), 1–14.
- 522 (18) Rowe, S. E.; Wagner, N. J.; Li, L.; Beam, J. E.; Wilkinson, A. D.; Radlinski, L. C.; Zhang,  
523 Q.; Miao, E. A.; Conlon, B. P. Reactive Oxygen Species Induce Antibiotic Tolerance  
524 during Systemic Staphylococcus Aureus Infection. *Nat. Microbiol.* **2019**, *5* (2), 282–290.
- 525 (19) Wang, Y.; Bojer, M. S.; George, S. E.; Wang, Z.; Jensen, P. R.; Wolz, C.; Ingmer, H.  
526 Inactivation of TCA Cycle Enhances Staphylococcus Aureus Persister Cell Formation in  
527 Stationary Phase. *Sci. Reports* **2018**, *8* (1), 1–13.
- 528 (20) Cirz, R. T.; Jones, M. B.; Gingles, N. A.; Minogue, T. D.; Jarrahi, B.; Peterson, S. N.;  
529 Romesberg, F. E. Complete and SOS-Mediated Response of Staphylococcus Aureus to the  
530 Antibiotic Ciprofloxacin. *J. Bacteriol.* **2007**, *189* (2), 531–539.
- 531 (21) Keren, I.; Kaldalu, N.; Spoering, A.; Wang, Y.; Lewis, K. Persister Cells and Tolerance to  
532 Antimicrobials. *FEMS Microbiol. Lett.* **2004**, *230* (1), 13–18.
- 533 (22) Conlon, B. P.; Rowe, S. E.; Gandt, A. B.; Nuxoll, A. S.; Donegan, N. P.; Zalis, E. A.;

- 534 Clair, G.; Adkins, J. N.; Cheung, A. L.; Lewis, K. Persister Formation in *Staphylococcus*  
535 *Aureus* Is Associated with ATP Depletion. *Nat. Microbiol.* **2016**, *1* (5), 1–7.
- 536 (23) Allison, K. R.; Brynildsen, M. P.; Collins, J. J. Metabolite-Enabled Eradication of  
537 Bacterial Persisters by Aminoglycosides. *Nature* **2011**, *473* (7346), 216–220.
- 538 (24) Kim, W.; Conery, A. L.; Rajamuthiah, R.; Fuchs, B. B.; Ausubel, F. M.; Mylonakis, E.  
539 Identification of an Antimicrobial Agent Effective against Methicillin-Resistant  
540 *Staphylococcus Aureus* Persisters Using a Fluorescence-Based Screening Strategy. *PLoS*  
541 *One* **2015**, *10* (6), e0127640.
- 542 (25) Conlon, B. P.; Nakayasu, E. S.; Fleck, L. E.; Lafleur, M. D.; Isabella, V. M.; Coleman, K.;  
543 Leonard, S. N.; Smith, R. D.; Adkins, J. N.; Lewis, K. Activated ClpP Kills Persisters and  
544 Eradicates a Chronic Biofilm Infection. *Nature* **2013**, *503* (7476), 365–370.
- 545 (26) Hiramatsu, K.; Aritaka, N.; Hanaki, H.; Kawasaki, S.; Hosoda, Y.; Hori, S.; Fukuchi, Y.;  
546 Kobayashi, I. Dissemination in Japanese Hospitals of Strains of *Staphylococcus Aureus*  
547 Heterogeneously Resistant to Vancomycin. *Lancet* **1997**, *350* (9092), 1670–1673.
- 548 (27) Farha, M. A.; Verschoor, C. P.; Bowdish, D.; Brown, E. D. Collapsing the Proton Motive  
549 Force to Identify Synergistic Combinations against *Staphylococcus Aureus*. *Chem. Biol.*  
550 **2013**, *20* (9), 1168–1178.
- 551 (28) Mates, S. M.; Patel, L.; Kaback, H. R.; Miller, M. H. Membrane Potential in  
552 Anaerobically Growing *Staphylococcus Aureus* and Its Relationship to Gentamicin  
553 Uptake. *Antimicrob. Agents Chemother.* **1983**, *23* (4), 526–530.
- 554 (29) Bakker, E. P.; Mangerich, W. E. Interconversion of Components of the Bacterial Proton  
555 Motive Force by Electrogenic Potassium Transport. *J. Bacteriol.* **1981**, *147* (3), 820–826.
- 556 (30) Kim, W.; Hendricks, G. L.; Tori, K.; Fuchs, B. B.; Mylonakis, E. Strategies against  
557 Methicillin-Resistant *Staphylococcus Aureus* Persisters. *Future Med. Chem.* **2018**, *10* (7),  
558 779–794.
- 559 (31) Stokes, J. M.; Yang, K.; Swanson, K.; Jin, W.; Cubillos-Ruiz, A.; Donghia, N. M.;  
560 MacNair, C. R.; French, S.; Carfrae, L. A.; Bloom-Ackerman, Z.; Tran, V. M.; Chiappino-  
561 Pepe, A.; Badran, A. H.; Andrews, I. W.; Chory, E. J.; Church, G. M.; Brown, E. D.;

- 562 Jaakkola, T. S.; Barzilay, R.; Collins, J. J. A Deep Learning Approach to Antibiotic  
563 Discovery. *Cell* **2020**, *180* (4), 688-702.e13.
- 564 (32) Dombach, J. L.; Quintana, J. L. J.; Detweiler, C. S. Staphylococcal Bacterial Persister  
565 Cells, Biofilms, and Intracellular Infection Are Disrupted by JD1, a Membrane-Damaging  
566 Small Molecule. *MBio* **2021**, *12* (5), e01801-21.
- 567 (33) Hasenoehrl, E. J.; Wiggins, T. J.; Berney, M. Bioenergetic Inhibitors: Antibiotic Efficacy  
568 and Mechanisms of Action in Mycobacterium Tuberculosis. *Front. Cell. Infect. Microbiol.*  
569 **2021**, *10*, 815.
- 570 (34) Feng, X.; Zhu, W.; Schurig-Briccio, L. A.; Lindert, S.; Shoen, C.; Hitchings, R.; Li, J.;  
571 Wang, Y.; Baig, N.; Zhou, T.; Kim, B. K.; Crick, D. C.; Cynamon, M.; McCammon, J. A.;  
572 Gennis, R. B.; Oldfield, E. Antiinfectives Targeting Enzymes and the Proton Motive  
573 Force. *Proc. Natl. Acad. Sci. U. S. A.* **2015**, *112* (51), E7073–E7082.
- 574 (35) Foss, M. H.; Eun, Y. J.; Grove, C. I.; Pauw, D. A.; Sorto, N. A.; Rensvold, J. W.;  
575 Pagliarini, D. J.; Shaw, J. T.; Weibel, D. B. Inhibitors of Bacterial Tubulin Target  
576 Bacterial Membranes in Vivo. *Medchemcomm* **2012**, *4* (1), 112–119.
- 577 (36) Weinstein, E. A.; Yano, T.; Li, L. S.; Avarbock, D.; Avarbock, A.; Helm, D.; McColm, A.  
578 A.; Duncan, K.; Lonsdale, J. T.; Rubin, H. Inhibitors of Type II NADH:Menaquinone  
579 Oxidoreductase Represent a Class of Antitubercular Drugs. *Proc. Natl. Acad. Sci. U. S. A.*  
580 **2005**, *102* (12), 4548–4553.
- 581 (37) French, S.; Farha, M.; Ellis, M. J.; Sameer, Z.; Côté, J. P.; Cotroneo, N.; Lister, T.; Rubio,  
582 A.; Brown, E. D. Potentiation of Antibiotics against Gram-Negative Bacteria by  
583 Polymyxin B Analogue SPR741 from Unique Perturbation of the Outer Membrane. *ACS*  
584 *Infect. Dis.* **2020**, *6* (6), 1405–1412.
- 585 (38) Nonejuie, P.; Burkart, M.; Pogliano, K.; Pogliano, J. Bacterial Cytological Profiling  
586 Rapidly Identifies the Cellular Pathways Targeted by Antibacterial Molecules. *Proc. Natl.*  
587 *Acad. Sci. U. S. A.* **2013**, *110* (40), 16169–16174.
- 588 (39) Bruno, M. E. C.; Kaiser, A.; Montville, T. J. Depletion of Proton Motive Force by Nisin in  
589 *Listeria Monocytogenes* Cells. *Appl. Environ. Microbiol.* **1992**, *58* (7), 2255–2259.

- 590 (40) Borselli, D.; Brunel, J. M.; Gorgé, O.; Bolla, J. M. Polyamino-Isoprenyl Derivatives as  
591 Antibiotic Adjuvants and Motility Inhibitors for Bordetella Bronchiseptica Porcine  
592 Pulmonary Infection Treatment. *Front. Microbiol.* **2019**, *0*, 1771.
- 593 (41) Machado, D.; Fernandes, L.; Costa, S. S.; Cannalire, R.; Manfroni, G.; Tabarrini, O.;  
594 Couto, I.; Sabatini, S.; Viveiros, M. Mode of Action of the 2-Phenylquinoline Efflux  
595 Inhibitor PQQ4R against Escherichia Coli. *PeerJ* **2017**, *2017* (4), e3168.
- 596 (42) Trimble, M. J.; Mlynářčík, P.; Kolář, M.; Hancock, R. E. W. Polymyxin: Alternative  
597 Mechanisms of Action and Resistance. *Cold Spring Harb. Perspect. Med.* **2016**, *6* (10).
- 598 (43) Boshoff, H. I. M.; Myers, T. G.; Copp, B. R.; McNeil, M. R.; Wilson, M. A.; Barry, C. E.  
599 The Transcriptional Responses of Mycobacterium Tuberculosis to Inhibitors of  
600 Metabolism. Novel Insights into Drug Mechanisms of Action. *J. Biol. Chem.* **2004**, *279*  
601 (38), 40174–40184.
- 602 (44) Strahl, H.; Hamoen, L. W. Membrane Potential Is Important for Bacterial Cell Division.  
603 *Proc. Natl. Acad. Sci. U. S. A.* **2010**, *107* (27), 12281–12286.
- 604 (45) van den Bergh, B.; Fauvart, M.; Michiels, J. Formation, Physiology, Ecology, Evolution  
605 and Clinical Importance of Bacterial Persisters. *FEMS Microbiol. Rev.* **2017**, *41* (3), 219–  
606 251.
- 607 (46) Krause, K. M.; Serio, A. W.; Kane, T. R.; Connolly, L. E. Aminoglycosides: An  
608 Overview. *Cold Spring Harb. Perspect. Med.* **2016**, *6* (6).
- 609 (47) Iovine, N. M. Resistance Mechanisms in Campylobacter Jejuni. **2013**, *4* (3), 230–240.
- 610 (48) Lewin, C. S.; Smith, J. T. Bactericidal Mechanisms of Ofloxacin. *J. Antimicrob.*  
611 *Chemother.* **1988**, *22* (Supplement\_C), 1–8.
- 612 (49) Silver, L. L. Fosfomycin: Mechanism and Resistance. *Cold Spring Harb. Perspect. Med.*  
613 **2017**, *7* (2), a025262.
- 614 (50) Watanakunakorn, C. Mode of Action and In-Vitro Activity of Vancomycin. *J. Antimicrob.*  
615 *Chemother.* **1984**, *14* (suppl\_D), 7–18.
- 616 (51) Li, N.; Ragheb, K.; Lawler, G.; Sturgis, J.; Rajwa, B.; Melendez, J. A.; Robinson, J. P.

- 617 Mitochondrial Complex I Inhibitor Rotenone Induces Apoptosis through Enhancing  
618 Mitochondrial Reactive Oxygen Species Production. *J. Biol. Chem.* **2003**, 278 (10), 8516–  
619 8525.
- 620 (52) Valls-Lacalle, L.; Barba, I.; Miró-Casas, E.; Albuquerque-Béjar, J. J.; Ruiz-Meana, M.;  
621 Fuertes-Agudo, M.; Rodríguez-Sinovas, A.; García-Dorado, D. Succinate Dehydrogenase  
622 Inhibition with Malonate during Reperfusion Reduces Infarct Size by Preventing  
623 Mitochondrial Permeability Transition. *Cardiovasc. Res.* **2016**, 109 (3), 374–384.
- 624 (53) Ma, X.; Jin, M.; Cai, Y.; Xia, H.; Long, K.; Liu, J.; Yu, Q.; Yuan, J. Mitochondrial  
625 Electron Transport Chain Complex III Is Required for Antimycin A to Inhibit Autophagy.  
626 *Chem. Biol.* **2011**, 18 (11), 1474–1481.
- 627 (54) Navarro, A.; Bández, M. J.; Gómez, C.; Repetto, M. G.; Boveris, A. Effects of Rotenone  
628 and Pyridaben on Complex I Electron Transfer and on Mitochondrial Nitric Oxide  
629 Synthase Functional Activity. *J. Bioenerg. Biomembr.* 2010 425 **2010**, 42 (5), 405–412.
- 630 (55) Doughty-Shenton, D.; Joseph, J. D.; Zhang, J.; Pagliarini, D. J.; Kim, Y.; Lu, D.; Dixon, J.  
631 E.; Casey, P. J. Pharmacological Targeting of the Mitochondrial Phosphatase PTPMT1. *J.*  
632 *Pharmacol. Exp. Ther.* **2010**, 333 (2), 584–592.
- 633 (56) Weinberg, S. E.; Chandel, N. S. Targeting Mitochondria Metabolism for Cancer Therapy.  
634 *Nat. Chem. Biol.* 2015 111 **2014**, 11 (1), 9–15.
- 635 (57) Desquiret, V.; Loiseau, D.; Jacques, C.; Douay, O.; Malthièry, Y.; Ritz, P.; Roussel, D.  
636 Dinitrophenol-Induced Mitochondrial Uncoupling in Vivo Triggers Respiratory  
637 Adaptation in HepG2 Cells. *Biochim. Biophys. Acta - Bioenerg.* **2006**, 1757 (1), 21–30.
- 638 (58) Syed, M.; Skonberg, C.; Hansen, S. H. Mitochondrial Toxicity of Diclofenac and Its  
639 Metabolites via Inhibition of Oxidative Phosphorylation (ATP Synthesis) in Rat Liver  
640 Mitochondria: Possible Role in Drug Induced Liver Injury (DILI). *Toxicol. Vitr.* **2016**, 31,  
641 93–102.
- 642 (59) Hamman, W. M.; Spencer, M. Relationship of Potassium Ion Transport and ATP  
643 Synthesis in Pea Cotyledon Mitochondria. *Can. J. Biochem.* **1977**, 55 (4), 376–383.
- 644 (60) Lemasters, J. J.; Theruvath, T. P.; Zhong, Z.; Nieminen, A. L. Mitochondrial Calcium and

- 645 the Permeability Transition in Cell Death. *Biochim. Biophys. Acta - Bioenerg.* **2009**, 1787  
646 (11), 1395–1401.
- 647 (61) Chen, G.; Zhang, X.; Zhao, M.; Wang, Y.; Cheng, X.; Wang, D.; Xu, Y.; Du, Z.; Yu, X.  
648 Celastrol Targets Mitochondrial Respiratory Chain Complex I to Induce Reactive Oxygen  
649 Species-Dependent Cytotoxicity in Tumor Cells. *BMC Cancer* **2011**, 11 (1), 1–13.
- 650 (62) Arinbasarova, A. Y.; Medentsev, A. G.; Krupyanko, V. I. Gossypol Inhibits Electron  
651 Transport and Stimulates ROS Generation in *Yarrowia Lipolytica* Mitochondria. *Open*  
652 *Biochem. J.* **2012**, 6, 11.
- 653 (63) Kracke, F.; Vassilev, I.; Krömer, J. O. Microbial Electron Transport and Energy  
654 Conservation - The Foundation for Optimizing Bioelectrochemical Systems. *Front.*  
655 *Microbiol.* **2015**, 6 (JUN), 575.
- 656 (64) Andrews, J. M. Determination of Minimum Inhibitory Concentrations. *J. Antimicrob.*  
657 *Chemother.* **2001**, 48 (suppl\_1), 5–16.
- 658 (65) Monecke, S.; Coombs, G.; Shore, A. C.; Coleman, D. C.; Akpaka, P.; Borg, M.; Chow,  
659 H.; Ip, M.; Jatzwauk, L.; Jonas, D.; Kadlec, K.; Kearns, A.; Laurent, F.; O'Brien, F. G.;  
660 Pearson, J.; Ruppelt, A.; Schwarz, S.; Scicluna, E.; Slickers, P.; Tan, H. L.; Weber, S.;  
661 Ehricht, R. A Field Guide to Pandemic, Epidemic and Sporadic Clones of Methicillin-  
662 Resistant *Staphylococcus Aureus*. *PLoS One* **2011**, 6 (4), e17936.
- 663 (66) Gohil, V. M.; Zhu, L.; Baker, C. D.; Cracan, V.; Yaseen, A.; Jain, M.; Clish, C. B.;  
664 Brookes, P. S.; Bakovic, M.; Mootha, V. K. Meclizine Inhibits Mitochondrial Respiration  
665 through Direct Targeting of Cytosolic Phosphoethanolamine Metabolism. *J. Biol. Chem.*  
666 **2013**, 288 (49), 35489–35499.
- 667 (67) Pereira, C. V.; Machado, N. G.; Oliveira, P. J. Mechanisms of Berberine (Natural Yellow  
668 18)–Induced Mitochondrial Dysfunction: Interaction with the Adenine Nucleotide  
669 Translocator. *Toxicol. Sci.* **2008**, 105 (2), 408–417.
- 670 (68) de Faria, P. A.; Bettanin, F.; Cunha, R. L. O. R.; Paredes-Gamero, E. J.; Homem-de-  
671 Mello, P.; Nantes, I. L.; Rodrigues, T. Cytotoxicity of Phenothiazine Derivatives  
672 Associated with Mitochondrial Dysfunction: A Structure-Activity Investigation.

- 673           *Toxicology* **2015**, *330*, 44–54.
- 674 (69) Lin, J.; Wu, Y.; Yang, D.; Zhao, Y. Induction of Apoptosis and Antitumor Effects of a  
675 Small Molecule Inhibitor of Bcl-2 and Bcl-Xl, Gossypol Acetate, in Multiple Myeloma in  
676 Vitro and in Vivo. *Oncol. Rep.* **2013**, *30* (2), 731–738.
- 677 (70) Villanueva-Paz, M.; Cordero, M. D.; Pavón, A. D.; Vega, B. C.; Cotán, D.; De la Mata,  
678 M.; Oropesa-Ávila, M.; Alcocer-Gomez, E.; de Laveria, I.; Garrido-Maraver, J.;  
679 Carrascosa, J.; Zaderenko, A. P.; Muntané, J.; de Miguel, M.; Sánchez-Alcázar, J. A.  
680 Amitriptyline Induces Mitophagy That Precedes Apoptosis in Human HepG2 Cells. *Genes*  
681 *Cancer* **2016**, *7* (7–8), 260.
- 682 (71) Biswal, S. S.; Datta, K.; Shaw, S. D.; Feng, X.; Robertson, J. D.; Kehrer, J. P. Glutathione  
683 Oxidation and Mitochondrial Depolarization as Mechanisms of Nordihydroguaiaretic  
684 Acid-Induced Apoptosis in Lipoxygenase-Deficient FL5.12 Cells. *Toxicol. Sci.* **2000**, *53*  
685 (1), 77–83.
- 686 (72) Orman, M. A.; Brynildsen, M. P. Inhibition of Stationary Phase Respiration Impairs  
687 Persister Formation in *E. Coli*. *Nat. Commun.* **2015**, *6* (1), 1–13.
- 688 (73) Wang, M.; Chan, E. W. C.; Wan, Y.; Wong, M. H. yin; Chen, S. Active Maintenance of  
689 Proton Motive Force Mediates Starvation-Induced Bacterial Antibiotic Tolerance in  
690 *Escherichia Coli*. *Commun. Biol.* **2021**, *4* (1), 1–11.
- 691 (74) Dabbeni-Sala, F.; Schiavo, G.; Palatini, P. Mechanism of Local Anesthetic Effect on  
692 Mitochondrial ATP Synthase as Deduced from Photolabelling and Inhibition Studies with  
693 Phenothiazine Derivatives. *Biochim. Biophys. Acta - Biomembr.* **1990**, *1026* (1), 117–125.
- 694 (75) Grimsey, E. M.; Fais, C.; Marshall, R. L.; Ricci, V.; Ciusa, M. L.; Stone, J. W.; Ivens, A.;  
695 Mallocci, G.; Ruggerone, P.; Vargiu, A. V.; Piddock, L. J. V. Chlorpromazine and  
696 Amitriptyline Are Substrates and Inhibitors of the Acrb Multidrug Efflux Pump. *MBio*  
697 **2020**, *11* (3).
- 698 (76) Mohiuddin, S. G.; Hoang, T.; Saba, A.; Karki, P.; Orman, M. A. Identifying Metabolic  
699 Inhibitors to Reduce Bacterial Persistence. *Front. Microbiol.* **2020**, *11*, 472.
- 700 (77) Cunningham-Oakes, E.; Soren, O.; Moussa, C.; Rathor, G.; Liu, Y.; Coates, A.; Hu, Y.



- 701 Nordihydroguaiaretic Acid Enhances the Activities of Aminoglycosides against  
702 Methicillin- Sensitive and Resistant Staphylococcus Aureus in Vitro and in Vivo. *Front.*  
703 *Microbiol.* **2015**, 6 (OCT), 1195.
- 704 (78) Mamouei, Z.; Alqarihi, A.; Singh, S.; Xu, S.; Mansour, M. K.; Ibrahim, A. S.; Uppuluri,  
705 P. Alexidine Dihydrochloride Has Broad-Spectrum Activities against Diverse Fungal  
706 Pathogens. *mSphere* **2018**, 3 (5).
- 707 (79) Dastidar, S. G.; Ganguly, K.; Chaudhuri, K.; Chakrabarty, A. N. The Anti-Bacterial  
708 Action of Diclofenac Shown by Inhibition of DNA Synthesis. *Int. J. Antimicrob. Agents*  
709 **2000**, 14 (3), 249–251.
- 710 (80) Padilla-Montaña, N.; Guerra, L. de L.; Moujir, L. Antimicrobial Activity and Mode of  
711 Action of Celastrol, a Nortriterpen Quinone Isolated from Natural Sources. *Foods* **2021**,  
712 *Vol. 10, Page 591* **2021**, 10 (3), 591.
- 713 (81) Mohiuddin, S. G.; Nguyen, T. V.; Orman, M. A. Pleiotropic Actions of Phenothiazine  
714 Drugs Are Detrimental to Gram-Negative Bacterial Persister Cells. *Commun. Biol.* **2022**,  
715 5 (1), 1–15.
- 716 (82) Mohiuddin, S. G.; Kavousi, P.; Orman, M. A. Flow-Cytometry Analysis Reveals Persister  
717 Resuscitation Characteristics. *BMC Microbiol.* **2020**, 20 (1), 1–13.
- 718 (83) Mohiuddin, S. G.; Orman, M. A. Monitoring Persister Resuscitation with Flow  
719 Cytometry. *Methods Mol. Biol.* **2021**, 2357, 209–222.

720

721

722

723

724

725

726

727

728 **Figures**

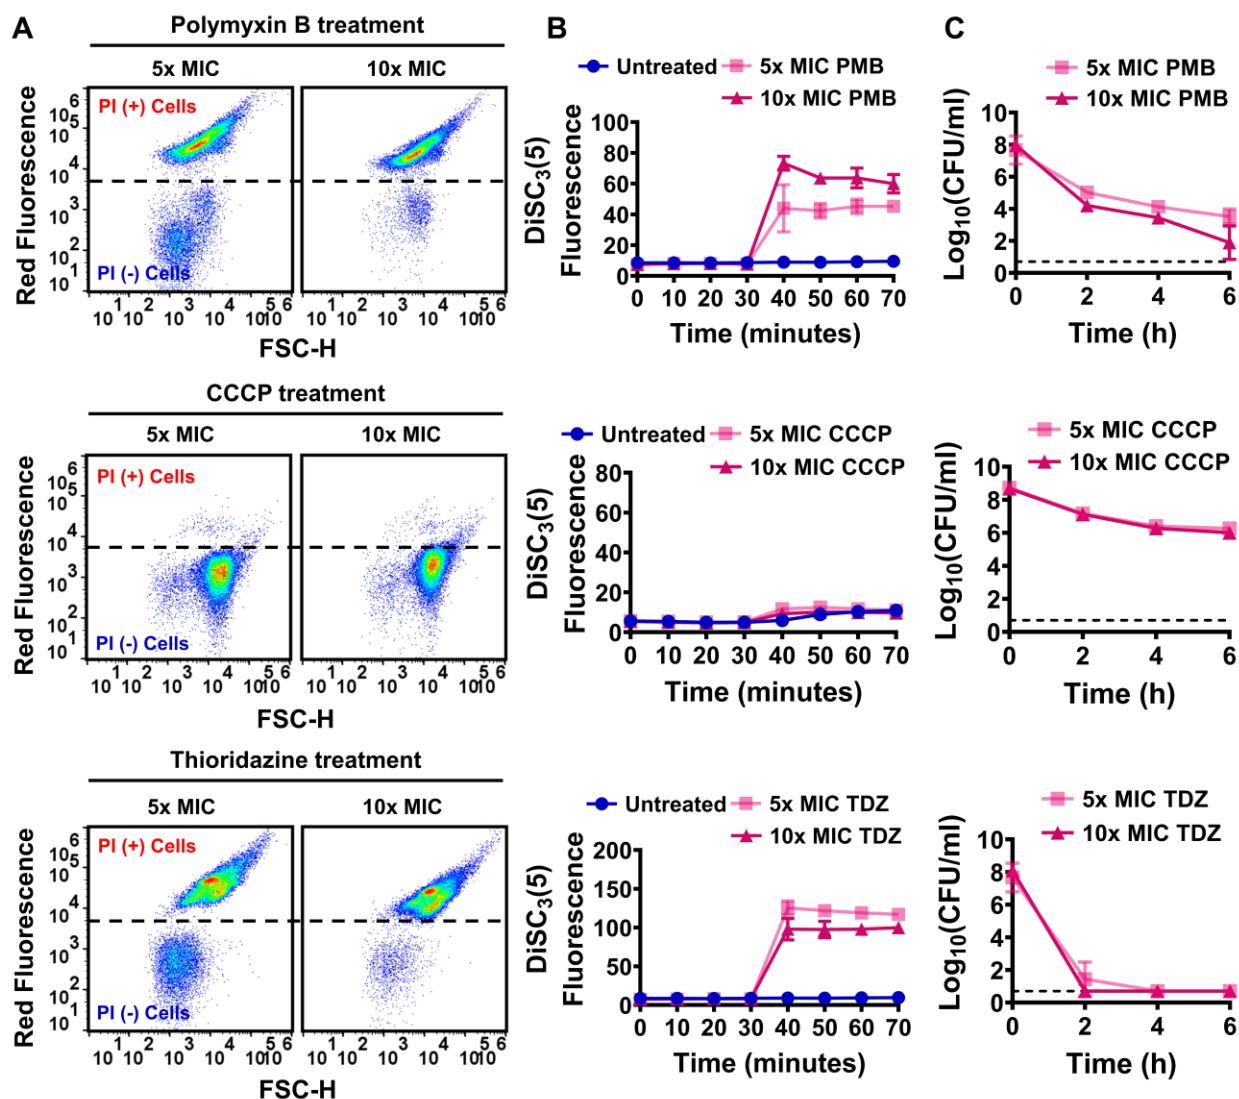

729

730 **Fig. 1. PMF inhibitors increased membrane permeability, disrupted cellular PMF, and**

731 **reduced persister levels in strain MRSA BAA-41.** (A) MRSA BAA-41 cells were grown to the

732 exponential phase ( $OD_{600}$  of  $\sim 0.1$ ) in Mueller–Hinton broth and treated with polymyxin B (PMB),

733 CCCP, or thioridazine (TDZ) at concentrations of 5 $\times$  and 10 $\times$  MIC (**Supplementary Table S1A**).

734 After 1 h treatment, cells were collected and stained with PI (20  $\mu$ M) dye for flow cytometry

735 analysis. Live and ethanol-treated (70%, v/v) dead cells were used as negative (–) and positive (+)

736 controls (**Supplementary Fig. S2**). A representative flow cytometry diagram is shown here; all

737 independent biological replicates produced similar results. (B) Cells grown to the exponential

738 phase ( $OD_{600}$  of  $\sim 0.1$ ) were transferred to DiSC<sub>3</sub>(5) assay buffer (50 mM HEPES, 300 mM KCl,

739 and 0.1% glucose) and stained with DiSC<sub>3</sub>(5). When the cells reached an equilibrium state ( $t = 30$

740 minutes), they were treated with polymyxin B, CCCP, or thioridazine at the indicated  
741 concentrations. The fluorescence levels were measured with a plate reader at designated time  
742 points. Cultures stained with the DiSC<sub>3</sub>(5) but not treated with PMF inhibitors were used as  
743 control. (C) Cells at the exponential phase (OD<sub>600</sub> of ~0.1) were treated with the drugs at the  
744 indicated concentrations for 6 h. At designated time points during treatments, cells were collected,  
745 washed to remove the chemicals, and spotted on Mueller–Hinton agar plates to obtain CFU counts.  
746 Dashed lines in panel C indicate the limit of detection. The number of biological replicates (n) =  
747 3. Data points represent mean ± SD.

748  
749  
750  
751  
752  
753  
754  
755  
756  
757  
758  
759  
760  
761  
762  
763  
764  
765  
766  
767  
768  
769  
770

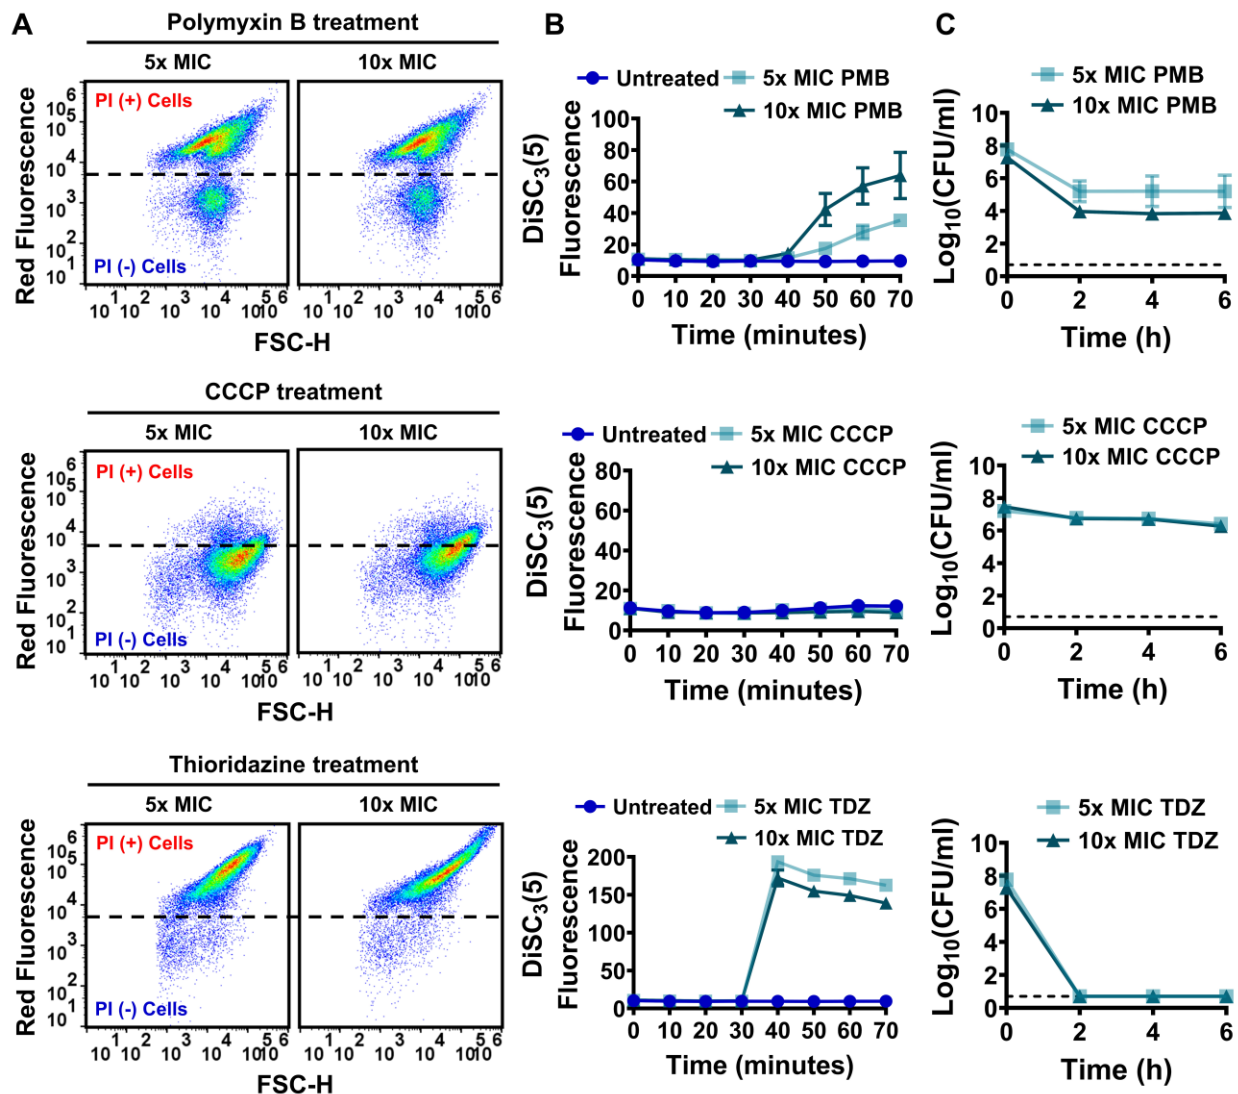

771  
 772 **Fig. 2. PMF inhibitors increased membrane permeability, disrupted cellular PMF, and**  
 773 **reduced persister levels in strain MRSA 700699.** Effects of polymyxin B (PMB), CCCP, and  
 774 thioridazine (TDZ) treatments on cell membranes (A), PMF (B), and persister levels (C) of MRSA  
 775 700699 cells were determined as described in Fig. 1. A representative flow cytometry diagram is  
 776 shown here; all independent biological replicates (n = 3) produced similar results. Dashed lines in  
 777 panel C indicate the limit of detection. Data points represent mean ± SD.

778  
 779  
 780  
 781  
 782

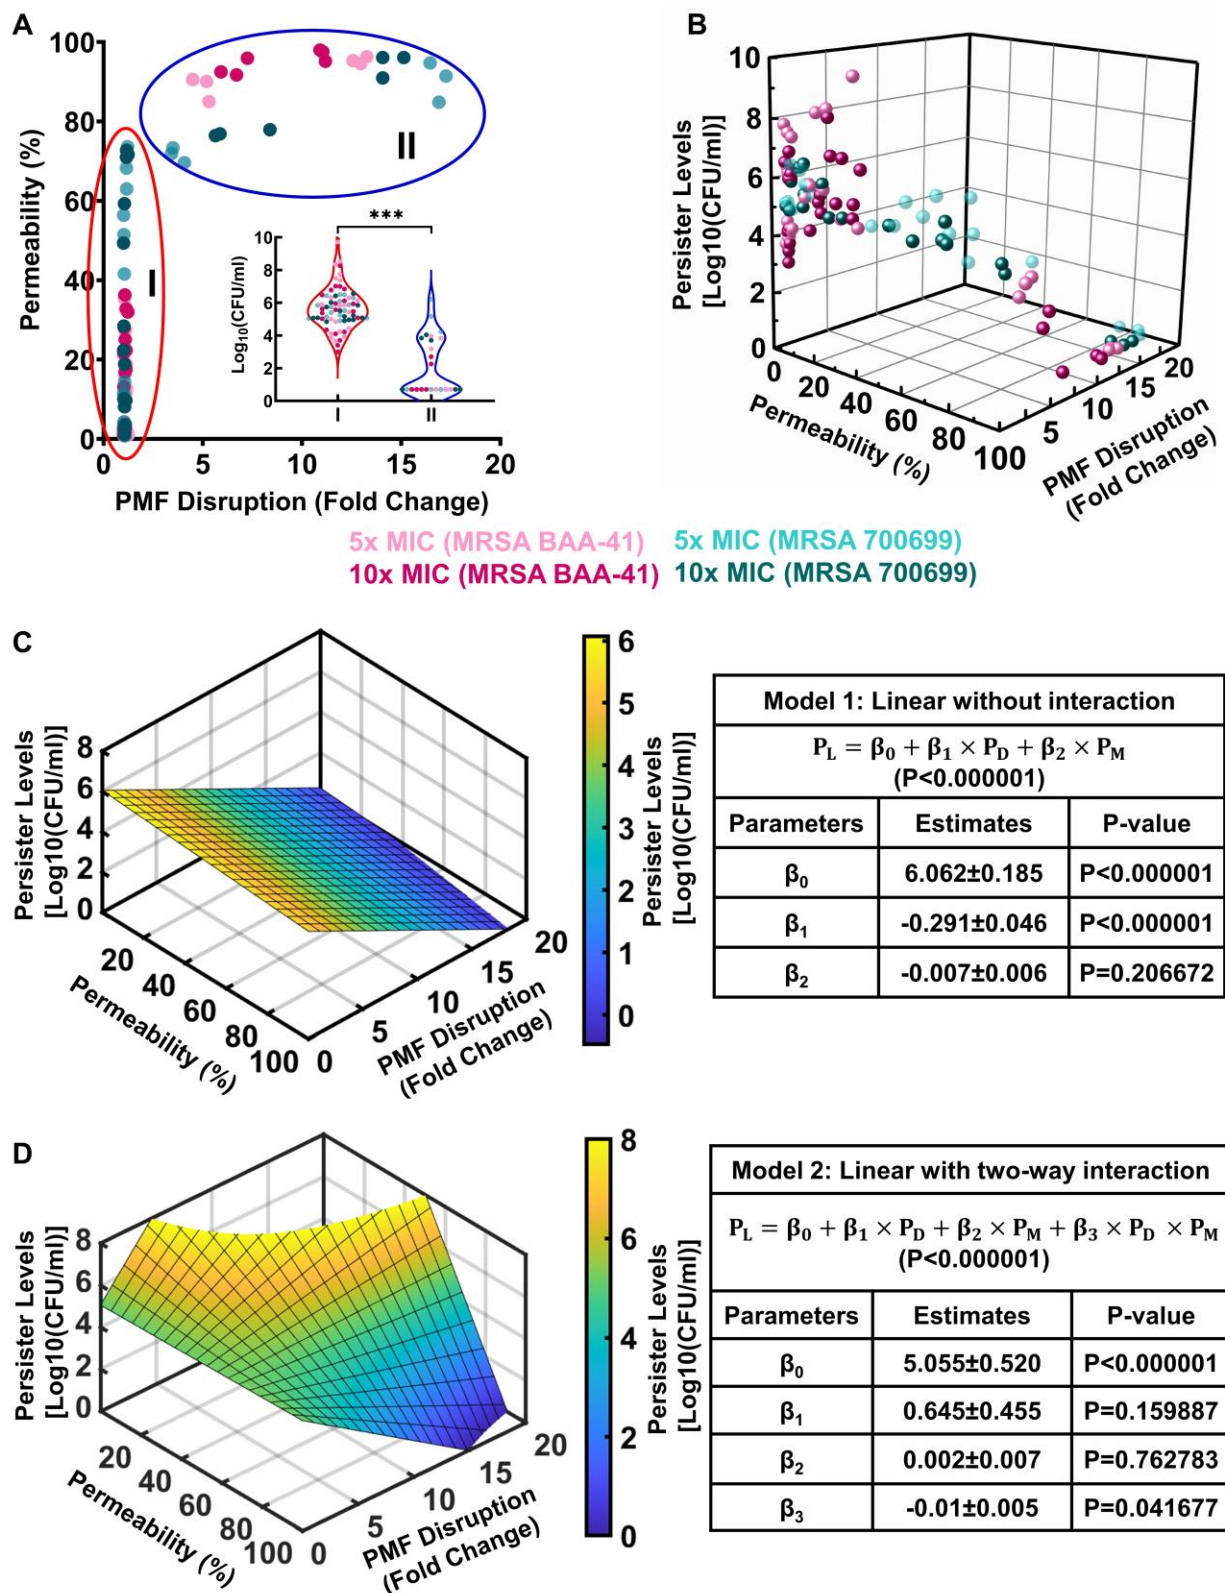

783

784 **Fig. 3. Simple multivariable regression analysis correlates the disruption of PMF and**

785 **membrane permeability to persister levels. (A, B) Two- and three-dimensional scatter plots**

786 including all data points for PMF inhibitors and conventional antibiotics for all concentrations and  
787 strains tested. In panel A, the red circle indicates cluster I, and the blue circle indicates cluster II.  
788 The persister levels corresponding to each cluster are presented in the inset. A Student's *t*-test with  
789 unequal variance was used to find the statistical significance between the persister levels of clusters  
790 I and II (\*\*\* $P < 0.0001$ ). **(C)** Multivariable linear regression analysis without an interaction  
791 between the independent variables. **(D)** Multivariable linear regression with a two-way interaction  
792 between the independent variables.  $P_L$  = persister level;  $P_D$  = PMF disruption; and  $P_M$  = membrane  
793 permeabilization. F statistics were used for the statistical analysis with the threshold value set to  $P$   
794 = 0.01.

795

796

797

798

799

800

801

802

803

804

805

806

807

808

809

810

811

812

813

814

815

816

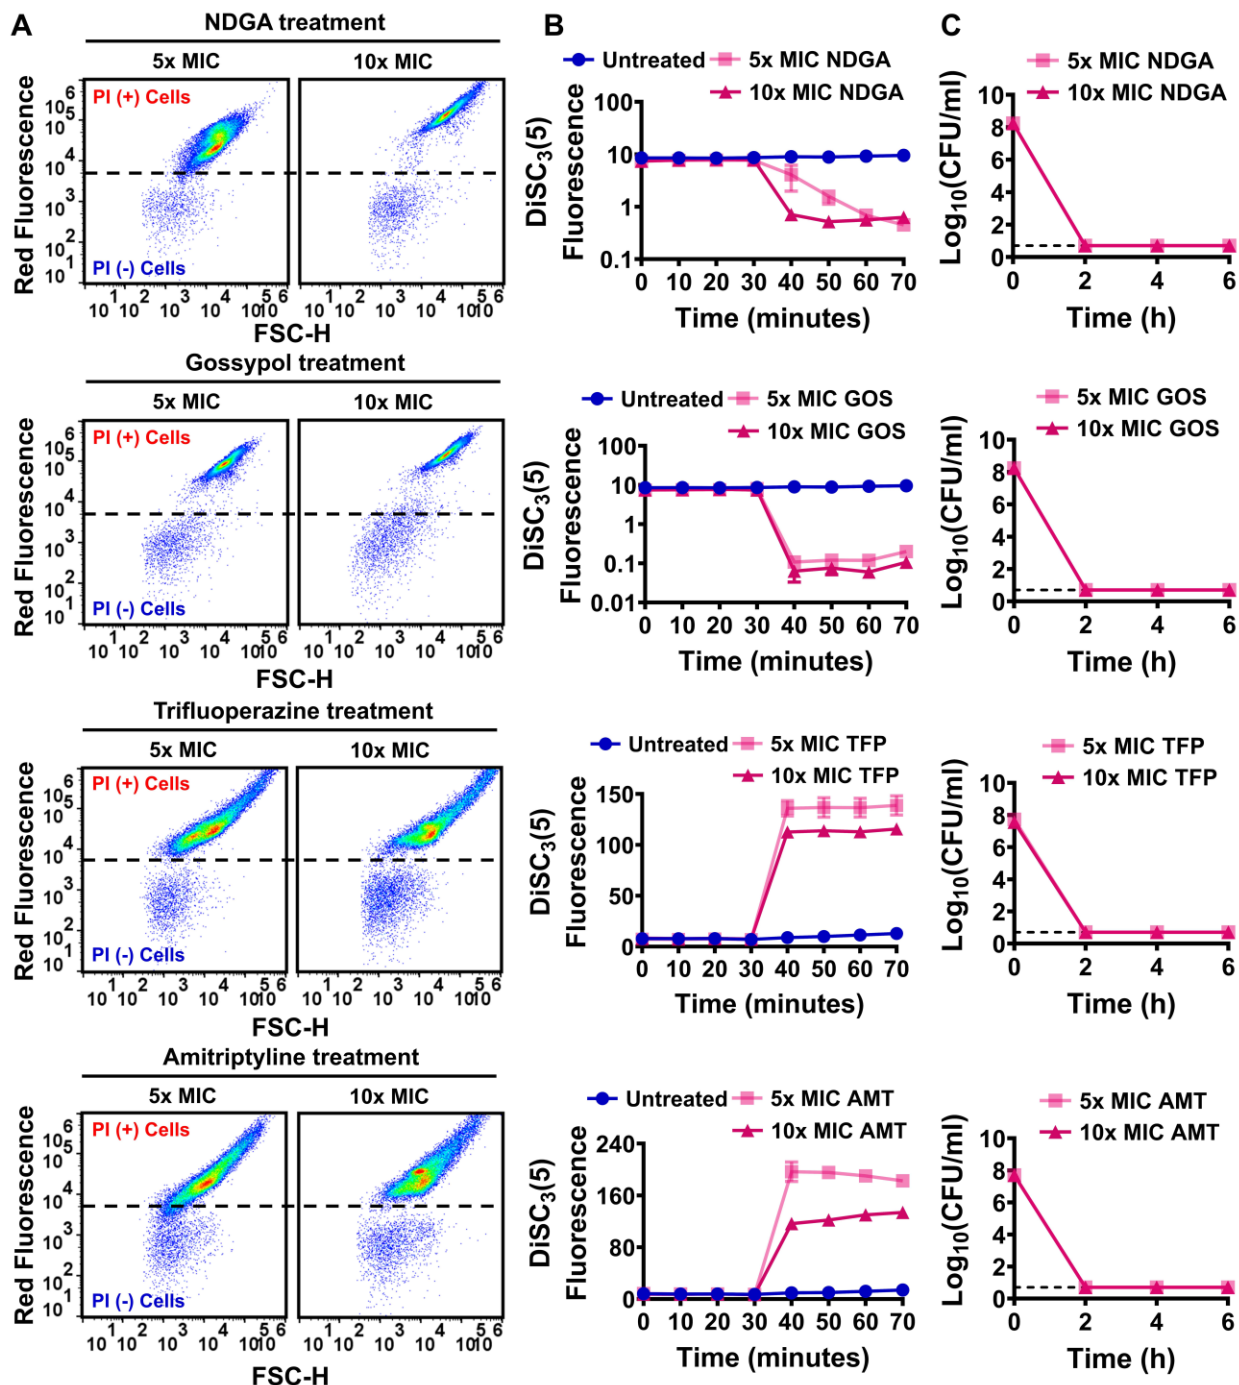

817  
 818 **Fig. 4. Identified drugs increased membrane permeability, disrupted cellular PMF, and**  
 819 **reduced persister levels in strain MRSA BAA-41.** Effects of nordihydroguaiaretic acid  
 820 (NDGA), gossypol (GOS), trifluoperazine (TFP), and amitriptyline (AMT) treatments on cell  
 821 membranes (A), PMF (B), and persister levels (C) of MRSA BAA-41 cells were determined as  
 822 described in **Fig. 1**. A representative flow cytometry diagram is shown here; all independent

823 biological replicates ( $n = 3$ ) produced similar results. Dashed lines in panel C indicate the limit of  
824 detection. Data points represent mean  $\pm$  SD.

825

826

827

828

829

830

831

832

833

834

835

836

837

838

839

840

841

842

843

844

845

846

847

848

849

850

851

852

853



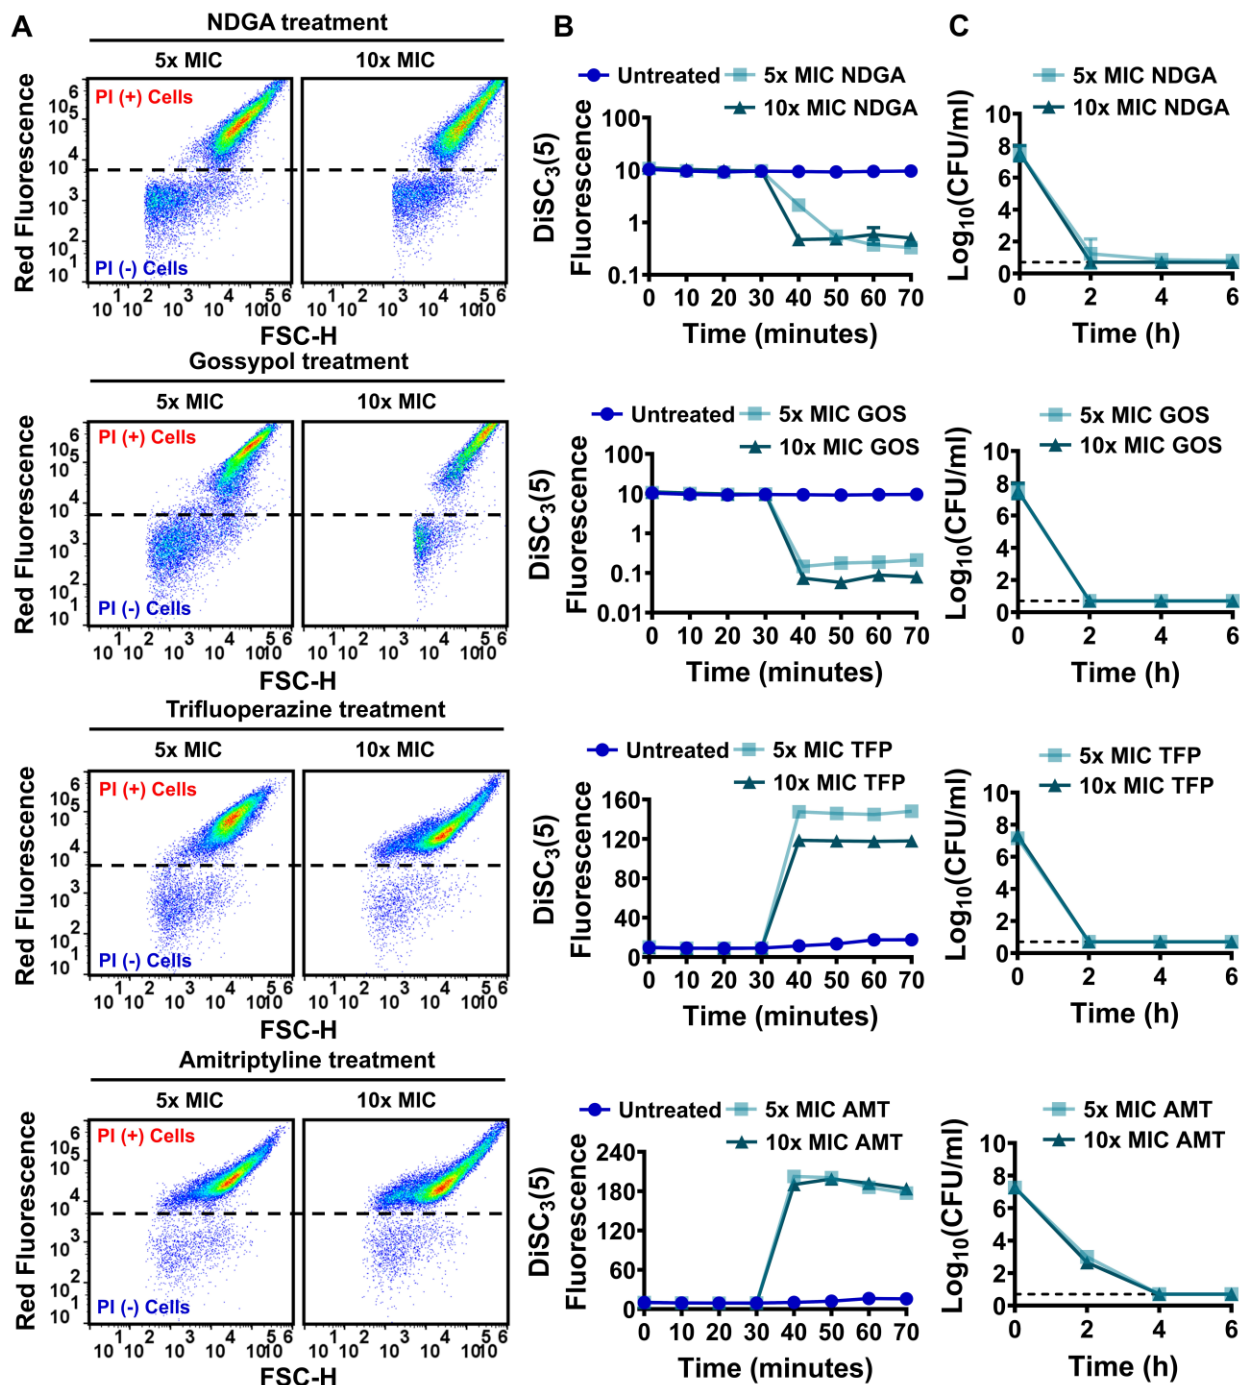

854  
 855 **Fig. 5. Identified drugs increased membrane permeability, disrupted cellular PMF, and**  
 856 **reduced persister levels in strain MRSA 700699.** Effects of nordihydroguaiaretic acid (NDGA),  
 857 gossypol (GOS), trifluoperazine (TFP), and amitriptyline (AMT) treatments on cell membranes  
 858 (A), PMF (B), and persister levels (C) of MRSA 700699 cells were determined as described in  
 859 **Fig. 1.** A representative flow cytometry diagram is shown here; all independent biological

860 replicates ( $n = 3$ ) produced similar results. Dashed lines in panel C indicate the limit of detection.  
861 Data points represent mean  $\pm$  SD.
